# Supplementary material for: Genome-wide histone modification profiling of inner cell mass and trophectoderm of bovine blastocysts by RAT-ChIP
Source: PubMed Central journal article supplement (PMC6876874; doi:10.1371/journal.pone.0225801), 2019-11-25

## A Heatmaps of H3K4me3 profiles around the TSS

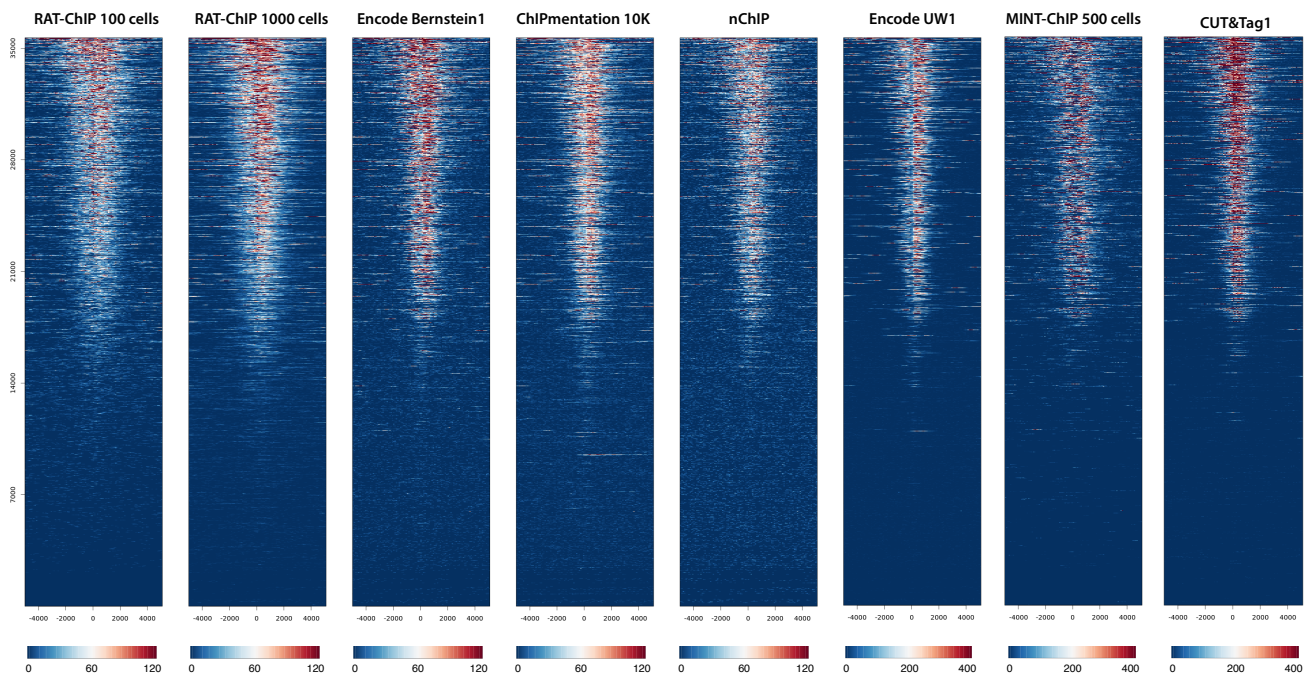

## B Average H3K4me3 profiles around the TSS

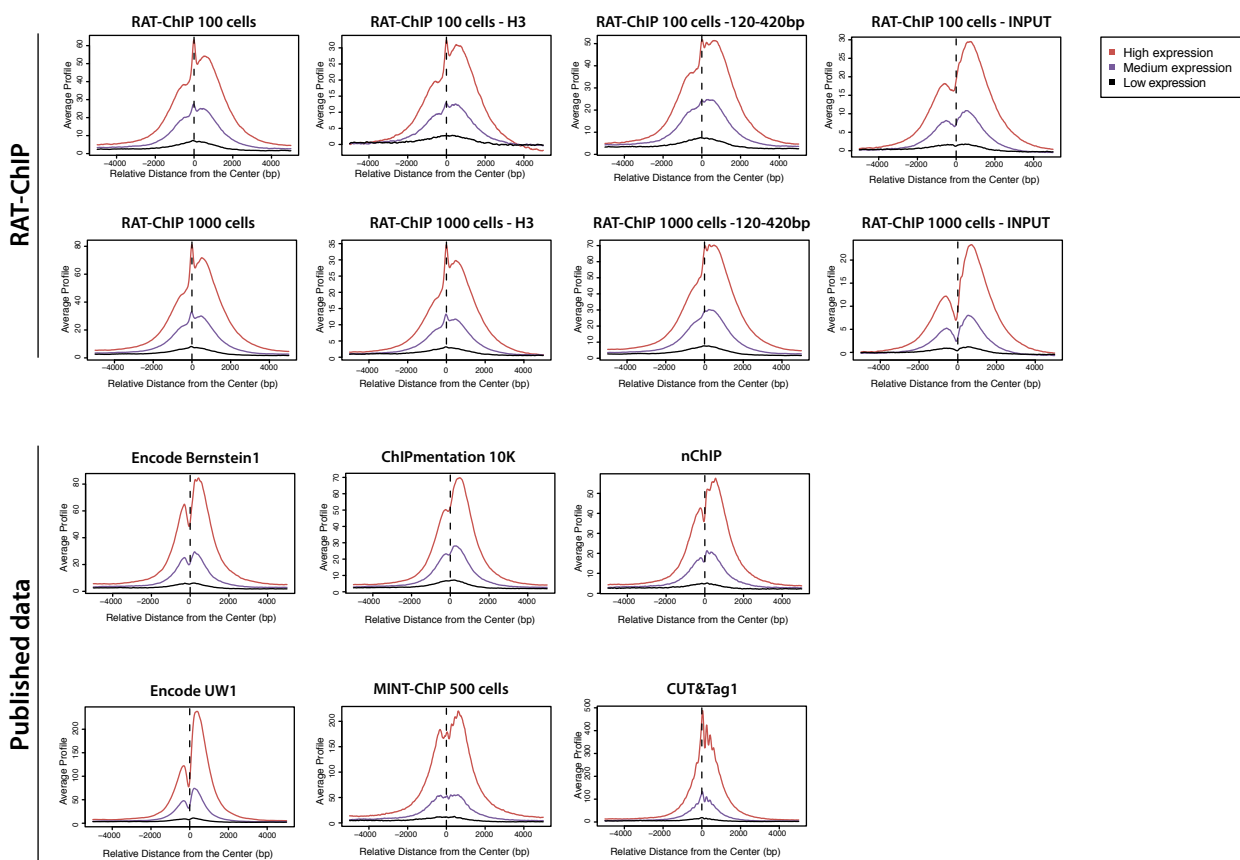

Supplement: pone.0225801.s005.pdf [file pone.0225801.s005.pdf]
