# Supplementary material for: Genome-wide histone modification profiling of inner cell mass and trophectoderm of bovine blastocysts by RAT-ChIP
Source: PubMed Central journal article supplement (PMC6876874; doi:10.1371/journal.pone.0225801), 2019-11-25

Average H3K27me3 profiles around 6kb metagene bodies and 3kb up- and downstream of TSS and TES

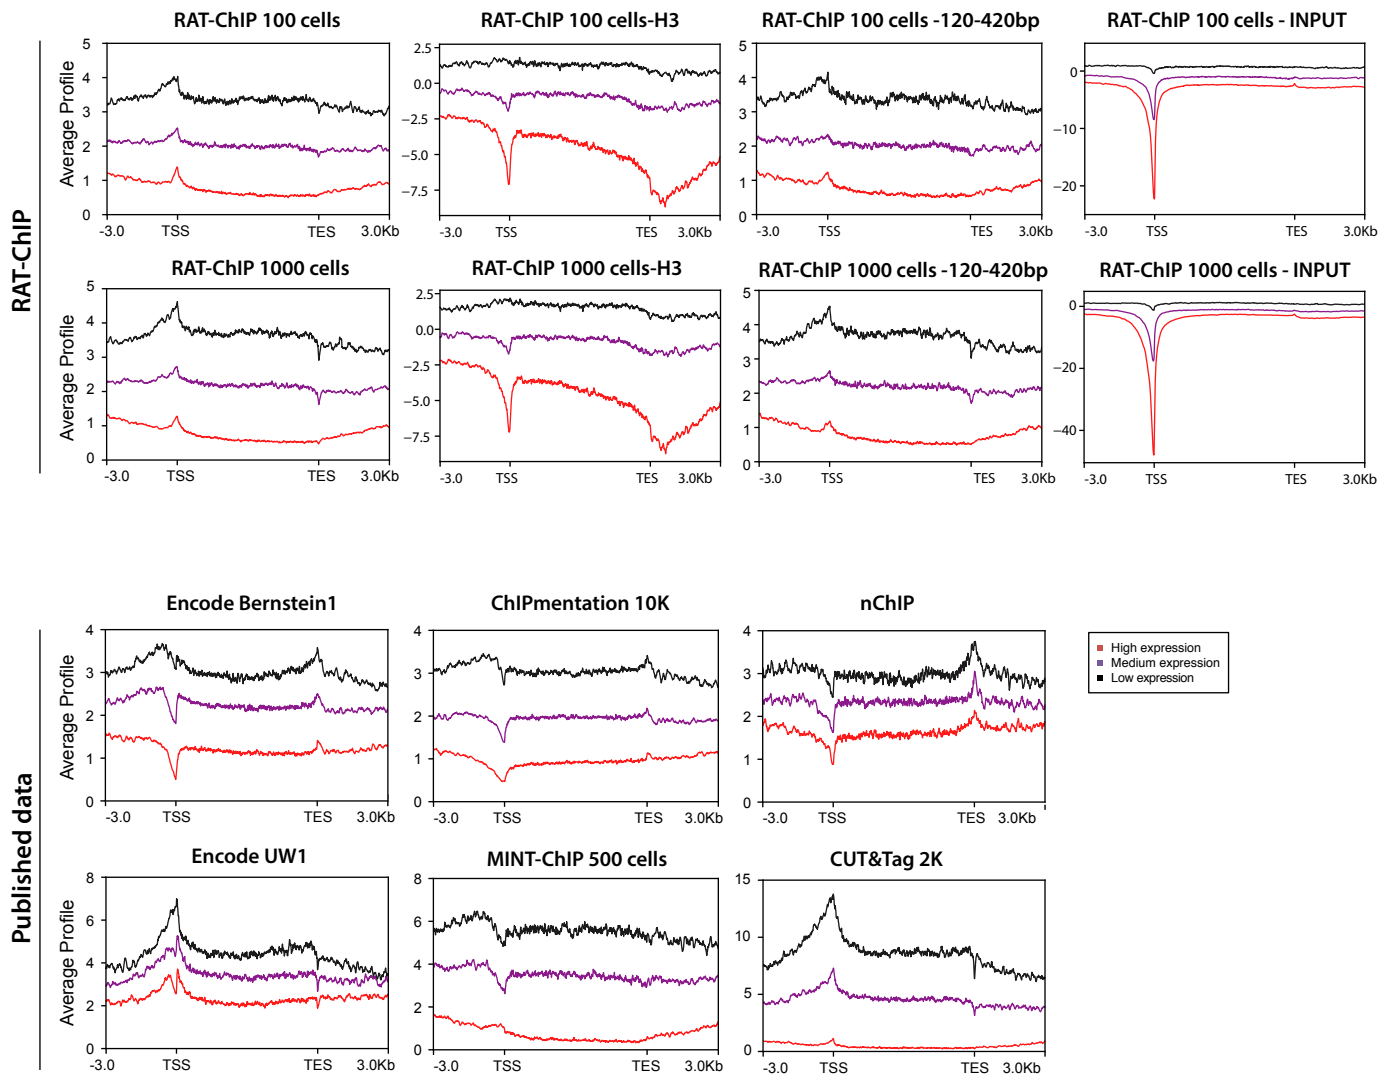

Supplement: pone.0225801.s006.pdf [file pone.0225801.s006.pdf]
