# Supplementary material for: Genome-wide histone modification profiling of inner cell mass and trophectoderm of bovine blastocysts by RAT-ChIP
Source: PubMed Central journal article supplement (PMC6876874; doi:10.1371/journal.pone.0225801), 2019-11-25

**A H3K4me3**

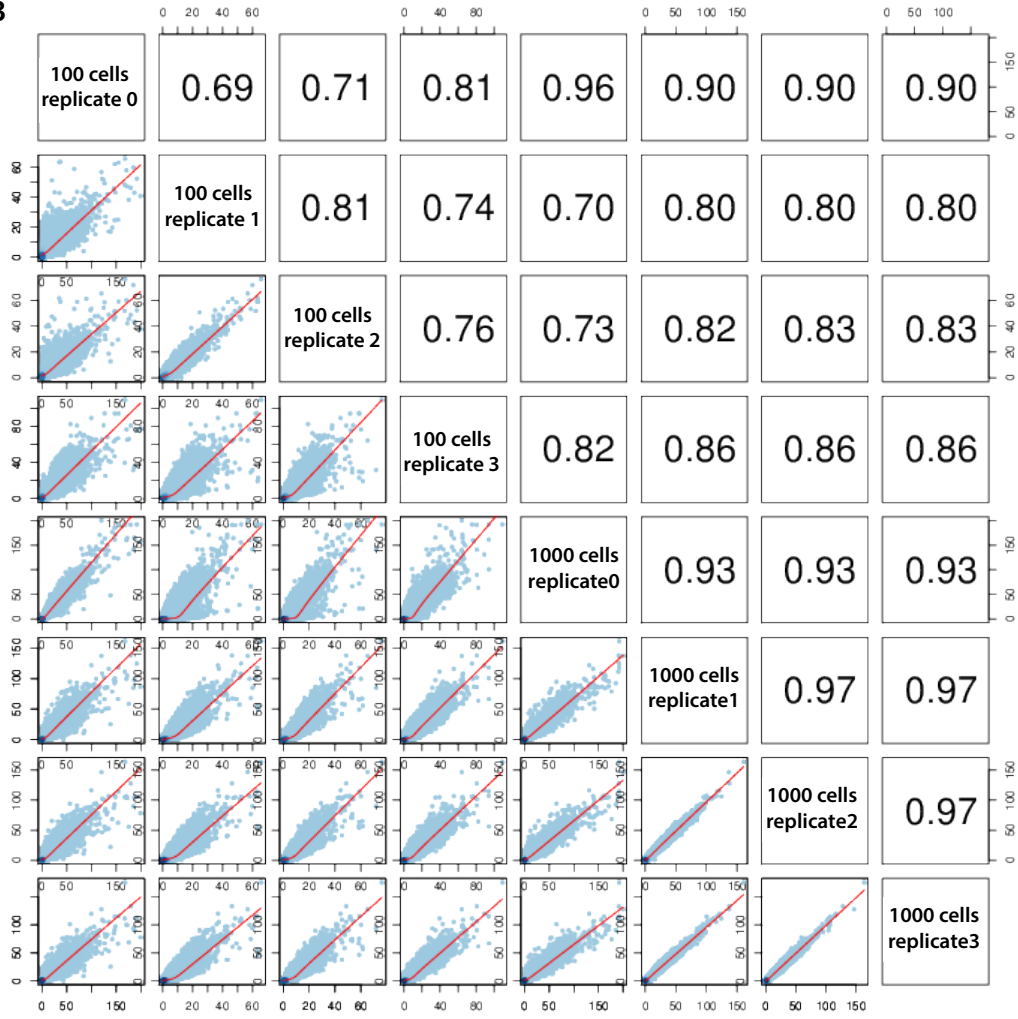

**B H3K27me3**

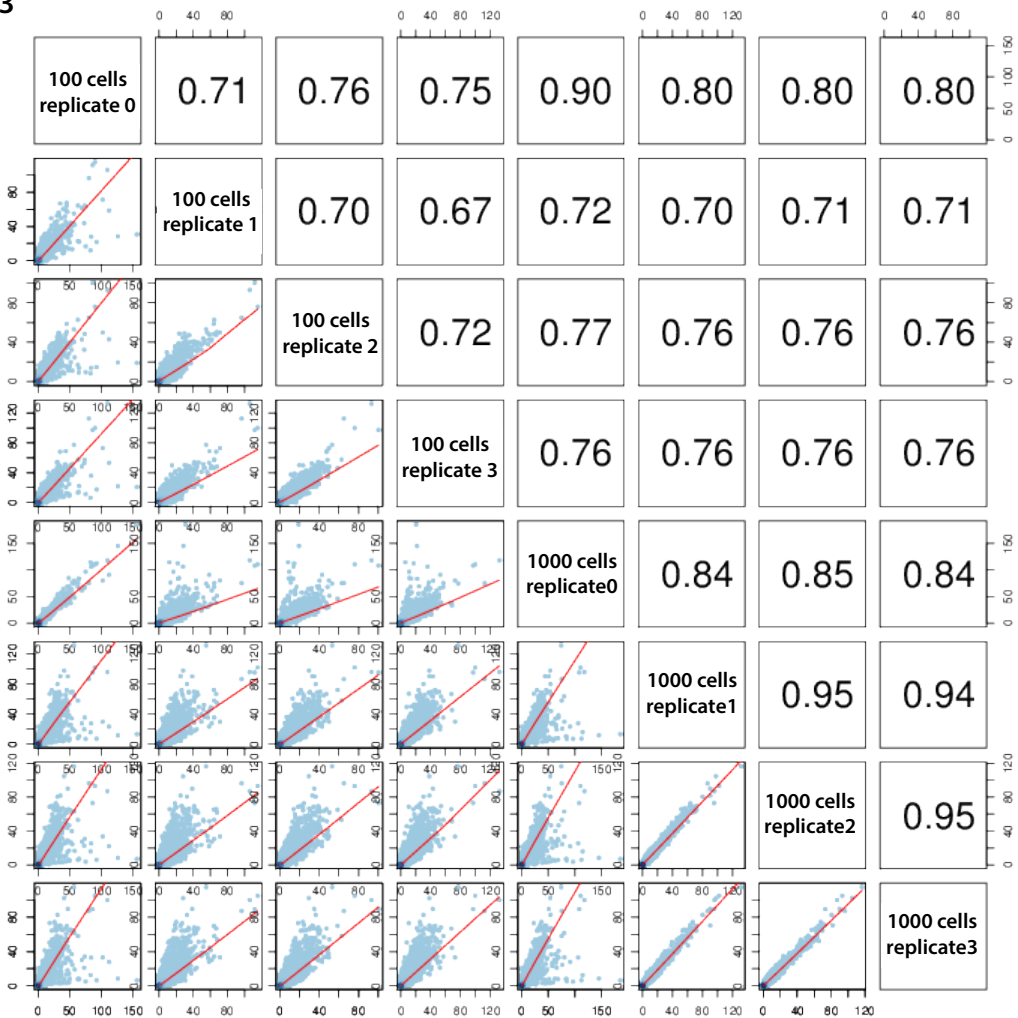

Supplement: pone.0225801.s008.pdf [file pone.0225801.s008.pdf]
