# Supplementary material for: Genome-wide histone modification profiling of inner cell mass and trophectoderm of bovine blastocysts by RAT-ChIP
Source: PubMed Central journal article supplement (PMC6876874; doi:10.1371/journal.pone.0225801), 2019-11-25

A

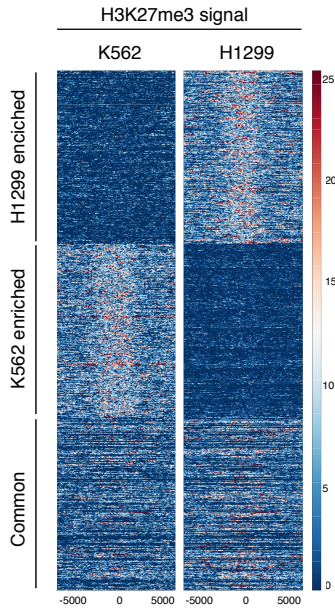

B

Enriched GO terms for cell type specific H3K27me3 regions

Higher H3K27me3 signal in H1299 cells - GO Biological Process

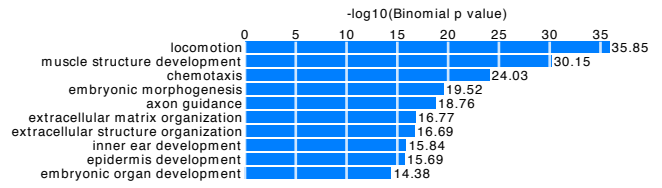

Higher H3K27me3 signal in H1299 cells - GO Biological Process

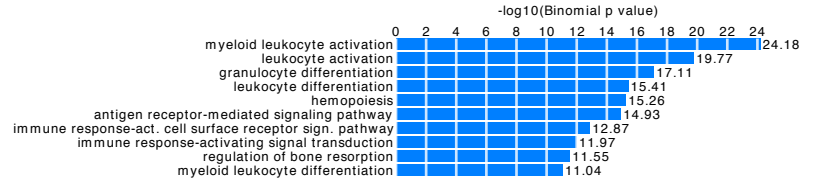

Supplement: pone.0225801.s012.pdf [file pone.0225801.s012.pdf]
