# Supplementary material for: Genome-wide histone modification profiling of inner cell mass and trophectoderm of bovine blastocysts by RAT-ChIP
Source: PubMed Central journal article supplement (PMC6876874; doi:10.1371/journal.pone.0225801), 2019-11-25
Supplement: pone.0225801.s013.pdf [file pone.0225801.s013.pdf]

A

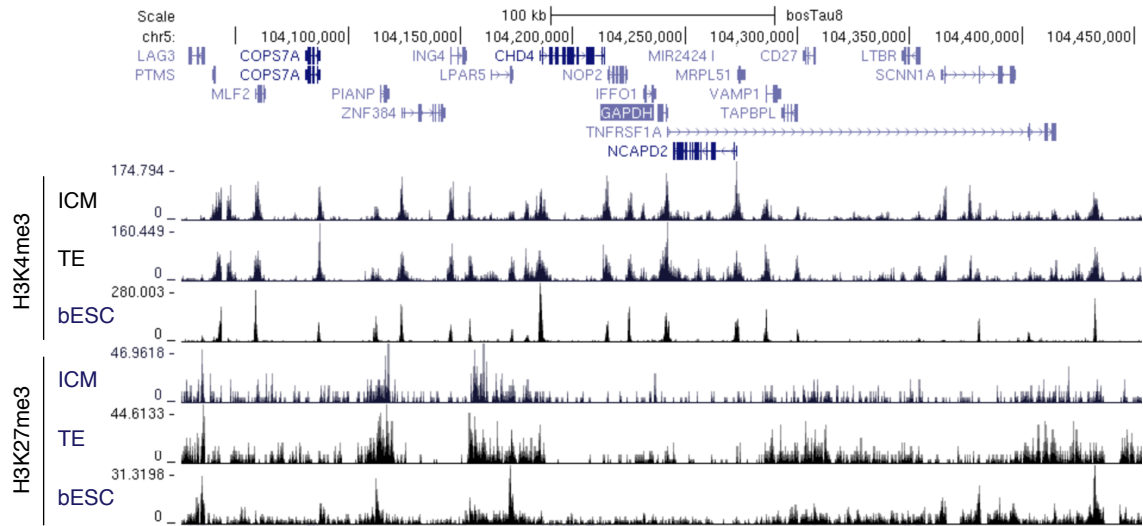

B

Genes upregulated in ICM

Genes upregulated in TE

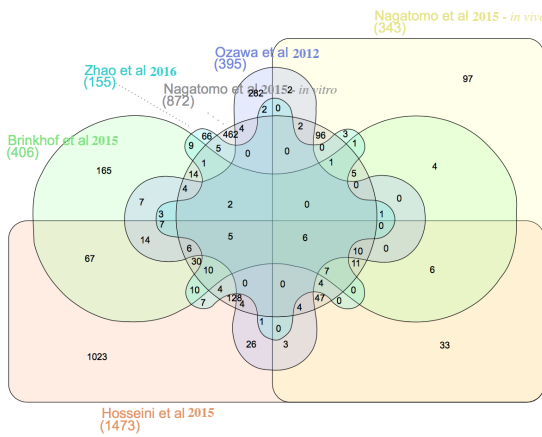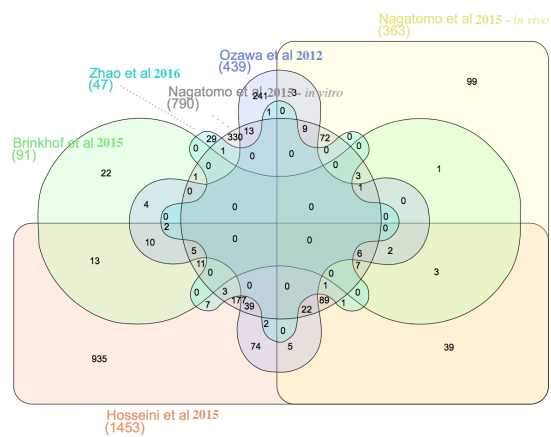

Common genes in no of datasets:

2091 - 1 dataset  
 407 - 2 datasets  
 136 - 3 datasets  
 46 - 4 datasets  
 22 - 5 datasets  
 6 - 6 datasets

Common genes in no of datasets:

1656 - 1 dataset  
 406 - 2 datasets  
 175 - 3 datasets  
 40 - 4 datasets  
 6 - 5 datasets  
 0 - 6 datasets
