# Supplementary material for: Genome-wide histone modification profiling of inner cell mass and trophectoderm of bovine blastocysts by RAT-ChIP
Source: PubMed Central journal article supplement (PMC6876874; doi:10.1371/journal.pone.0225801), 2019-11-25
Supplement: pone.0225801.s016.pdf [file pone.0225801.s016.pdf]

## **S1 File. RAT-ChIP-seq protocol**

The RAT-ChIP-seq protocol has seven major steps:

1. Bind antibodies to protein G Dynabeads
2. Cell preparation for IP
3. Chromatin immunoprecipitation
4. On beads tagmentation
5. PCR for sequencing library construction
6. PCR purification
7. Library quality control and sequencing

The amounts given in the protocol below are for a single immunoprecipitation (IP). When working with multiple samples, please scale the volumes accordingly. For simultaneous processing of multiple samples please use multichannel pipets and 0.2ml 8-strip PCR tubes.

### **Step 1. Bind antibodies to protein G Dynabeads**

- Pipet 1µl of protein G Dynabeads per IP into standard 0.2ml eppendorf tube containing 50 µl of IP buffer at RT.
- Capture the magnetic beads by 1 min incubation on a magnetic stand (Diagenode) and careful removal of the buffer.
- Take beads up in, 2 times the volume of beads (2µl per IP), IP buffer. Add 0.25µg of corresponding antibody per IP and incubate 2 h at RT with end-over end mixing (30 rpm).
- Wash the beads 2 times with 50 µl of IP buffer at RT by gently pipetting the beads 10 times up and down.
- Suspend the beads in the original amount of IP buffer (1µl per IP).

**NB!** We recommend preparing one sample for IP with general histone H3 antibody, that can be used as an input. Process the H3 sample identical to the other samples.

### **Step 2. Cell preparation for IP**

- Collect your cells of interest and count density using heamocytometer.
- Centrifuge 1000 g for 5 min, remove supernatant by pipeting and take the pellet up in PBS at desired density (for example 100 cells or 1000 cells) per 0.5µl.
- Prepare 10µl of nuclear lysis/restriction buffer by combining:

0.5µl of PIC (protease inhibitor cocktail) (Roche)  
1µl 10x FastDigest buffer (Thermo Fisher Scientific)  
0.5µl of restriction enzyme mix (AluI, SaqAI, MvaI, HinfI - mixed in equal volumes)  
8µl of 2x nuclear lysis buffer

- Mix 0.5µl cells with 0.5µl of nuclear lysis/restriction buffer and incubate 10 min on ice and 5 min at 37°C.

- Put samples back to ice and add:  
1µl of 0.2% TritonX-100/0.2% NaDOC solution

- Incubate 10 min on ice and vortex for 30 sec.

### **Step 3. Chromatin immunoprecipitation**

- To prepare the samples for immunoprecipitation add:

8µl of IP buffer  
1µl of antibody bound Dynabeads

- Perform IP 4h at 4°C with end-over end mixing (30 rpm).
- Wash 3 times with 100ul of low salt buffer, 3 times with 100ul of high salt buffer, 1 time with 100µl of IP buffer and 1 time with Tris HCl pH7.4 by gently pipetting the beads 10 times up and down. Capture the magnetic beads by 1min incubation on a magnetic stand (Diagenode).
- After adding Tris HCl pH7.4, suspend the beads and carry them over to a new 0.2ml tube to reduce background.

**NB!** Be careful when removing Tris HCl pH7.4 buffer during the last wash, as the beads tend to come loose from the magnet!

### **Step 4. On beads tagmentation**

- Prepare tagging mix by combining (scale according to number of reactions):

2.5µl 2x Tagmentation buffer from Nextera DNA Library preparation kit  
2.5µl mQ  
0.5µl of Tn5 transposase

- Add 5µl of the mix to the magnetic beads, resuspend by pipetting and perform tagmentation 1min at 37°C.

- Wash once with 50µl of low salt buffer and once with TE.

### **Step 5. PCR for sequencing library construction**

**NB!** Please choose appropriate primers for the samples that you want to sequence simultaneously. Ad1\_noMX primer is always the same. Ad2 primers have different barcodes that during data processing will be used to assign the reads to a correct sample.

- Prepare PCR mix (scale according to the number of reactions):

10µl of NEBNext High-Fidelity 2X PCR Master Mix

5µl mQ

2.5µl Ad1\_noMX primer (5µM)

- Add 17.5µl of mix directly to washed beads and finally add 2.5µl of corresponding Ad2.X primer (5µM) and do 16 cycles of PCR using the following program:

1. 72°C 5 min,

2. 98°C 2 min,

3. 98°C 10 sec,

4. 63°C 10 sec,

5. 72°C 1 min,

6. repeat steps 3-5 15 times

7. hold at 4°C

### **Step 6. PCR purification**

- After PCR put samples to magnetic rack and take 20µl of supernatant to a clean 0.2ml tube.

- Add 20µl of mQ to and 40µl of Agencourt RNA XP magnetic beads (1:1).

- Incubate 10 min at RT.

- Wash 2 times with 100ul of 70% EtOH .

- Dry beads 5 min at RT.

- Elute with 10µl of Tris HCl pH7.4 by pipetting and remove supernatant after 1 min incubation on magnetic rack.

### **Step 7. Library quality control and sequencing**

Quantify the library (by Nanodrop, Qubit, TapeStation etc.) and perform sequencing using Illumina platform.

## **Materials**

Dynabeads Protein G for Immunoprecipitation (Thermo Fisher)  
Catalog #: 10004D

Nextera DNA library preparation kit 24 samples (Illumina)  
Catalog #: FC-121-1030

NEBNext High-Fidelity 2X PCR Master Mix - 250 rxns (New England Biolabs)  
Catalog #: M0541L

Agencourt RNAClean XP Magnetic Beads (Beckman Coulter)  
Catalog #: A63987

cOmplete™ Protease Inhibitor Cocktail (Roche)  
Catalog #: 4693116001

FastDigest Buffer (10X) (Thermo Fisher) - Catalog #: B64

FastDigest AluI (Thermo Fisher) - Catalog #: FD0014

FastDigest MvaI (Thermo Fisher) - Catalog #: FD0554

FastDigest HinfI (Thermo Fisher) - Catalog #: FD0804

FastDigest SaqAI (Thermo Fisher) - Catalog #: FD2174

## **Buffers**

### **2x Nuclei preparation buffer:**

- 20 mM Tris HCl pH 7.4
- 20 mM NaCl
- 6 mM MgCl<sub>2</sub>
- 0.2% IGEPAL CA-630 (NP-40)

### **Complete Immunoprecipitation buffer (IP )**

- 20 mM Tris-HCl pH 8.0
- 2 mM EDTA
- 150 mM NaCl
- 0.1% Triton X-100
- 1x Protease inhibitor cocktail (Roche)

### **Low Salt Wash buffer**

- 20 mM Tris-HCl pH 8.0
- 2 mM EDTA
- 150 mM NaCl
- 1% Triton X-100

### **High Salt Wash buffer**

- 20 mM Tris-HCl pH 8.0
- 2 mM EDTA
- 500 mM NaCl
- 1% Triton X-100
- 0.1% SDS

### **TE buffer**

- 10 mM Tris-HCl pH 8.0
- 1 mM EDTA

## PCR primer sequences for sequencing library generation:

|                 |                                                        |
|-----------------|--------------------------------------------------------|
| Ad1_noMX:       | AATGATACGGCGACCACCGAGATCTACACTCGTTCGGCAGCGTCAGATGTG    |
| Ad2.1_TAAGGCGA  | CAAGCAGAAGACGGCATAACGAGATTCGCCTTAGTCTCGTGGGCTCGGAGATGT |
| Ad2.2_CGTACTAG  | CAAGCAGAAGACGGCATAACGAGATCTAGTACGGTCTCGTGGGCTCGGAGATGT |
| Ad2.3_AGGCAGAA  | CAAGCAGAAGACGGCATAACGAGATTTCTGCCTGTCTCGTGGGCTCGGAGATGT |
| Ad2.4_TCCTGAGC  | CAAGCAGAAGACGGCATAACGAGATGCTCAGGAGTCTCGTGGGCTCGGAGATGT |
| Ad2.5_GGACTCCT  | CAAGCAGAAGACGGCATAACGAGATAGGAGTCCGTCTCGTGGGCTCGGAGATGT |
| Ad2.6_TAGGCATG  | CAAGCAGAAGACGGCATAACGAGATCATGCCTAGTCTCGTGGGCTCGGAGATGT |
| Ad2.7_CTCTCTAC  | CAAGCAGAAGACGGCATAACGAGATGTAGAGAGGTCTCGTGGGCTCGGAGATGT |
| Ad2.8_CAGAGAGG  | CAAGCAGAAGACGGCATAACGAGATCCTCTCTGGTCTCGTGGGCTCGGAGATGT |
| Ad2.9_GCTACGCT  | CAAGCAGAAGACGGCATAACGAGATAGCGTAGCGTCTCGTGGGCTCGGAGATGT |
| Ad2.10_CGAGGCTG | CAAGCAGAAGACGGCATAACGAGATCAGCCTCGGTCTCGTGGGCTCGGAGATGT |
| Ad2.11_AAGAGGCA | CAAGCAGAAGACGGCATAACGAGATTGCCTCTTGTCTCGTGGGCTCGGAGATGT |
| Ad2.12_GTAGAGGA | CAAGCAGAAGACGGCATAACGAGATTCCTCTACGTCTCGTGGGCTCGGAGATGT |
| Ad2.13_GTCGTGAT | CAAGCAGAAGACGGCATAACGAGATATCACGACGTCTCGTGGGCTCGGAGATGT |
| Ad2.14_ACCACTGT | CAAGCAGAAGACGGCATAACGAGATACAGTGGTGTCTCGTGGGCTCGGAGATGT |
| Ad2.15_TGGATCTG | CAAGCAGAAGACGGCATAACGAGATCAGATCCAGTCTCGTGGGCTCGGAGATGT |
| Ad2.16_CCGTTTGT | CAAGCAGAAGACGGCATAACGAGATACAAACGGGTCTCGTGGGCTCGGAGATGT |
| Ad2.17_TGCTGGGT | CAAGCAGAAGACGGCATAACGAGATACCCAGCAGTCTCGTGGGCTCGGAGATGT |
| Ad2.18_GAGGGGTT | CAAGCAGAAGACGGCATAACGAGATAACCCCTCGTCTCGTGGGCTCGGAGATGT |
| Ad2.19_AGGTTGGG | CAAGCAGAAGACGGCATAACGAGATCCCAACCTGTCTCGTGGGCTCGGAGATGT |
| Ad2.20_GTGTGGTG | CAAGCAGAAGACGGCATAACGAGATCACCACACGTCTCGTGGGCTCGGAGATGT |
| Ad2.21_TGGGTTTC | CAAGCAGAAGACGGCATAACGAGATGAAACCCAGTCTCGTGGGCTCGGAGATGT |
| Ad2.22_TGGTCACA | CAAGCAGAAGACGGCATAACGAGATTGTGACCAGTCTCGTGGGCTCGGAGATGT |
| Ad2.23_TTGACCCT | CAAGCAGAAGACGGCATAACGAGATAGGGTCAAGTCTCGTGGGCTCGGAGATGT |
| Ad2.24_CCACTCCT | CAAGCAGAAGACGGCATAACGAGATAGGAGTGGGTCTCGTGGGCTCGGAGATGT |
